# Supplementary material for: Continuous Modeling of T CD4 Lymphocyte Activation and Function
Source: PubMed Central journal article supplement (PMC8602102; doi:10.3389/fimmu.2021.743559), 2021-11-05
Supplement: DataSheet_3.pdf [file DataSheet_3.pdf]

Previous Boolean model

Boolean model including  
metabolism module

A)

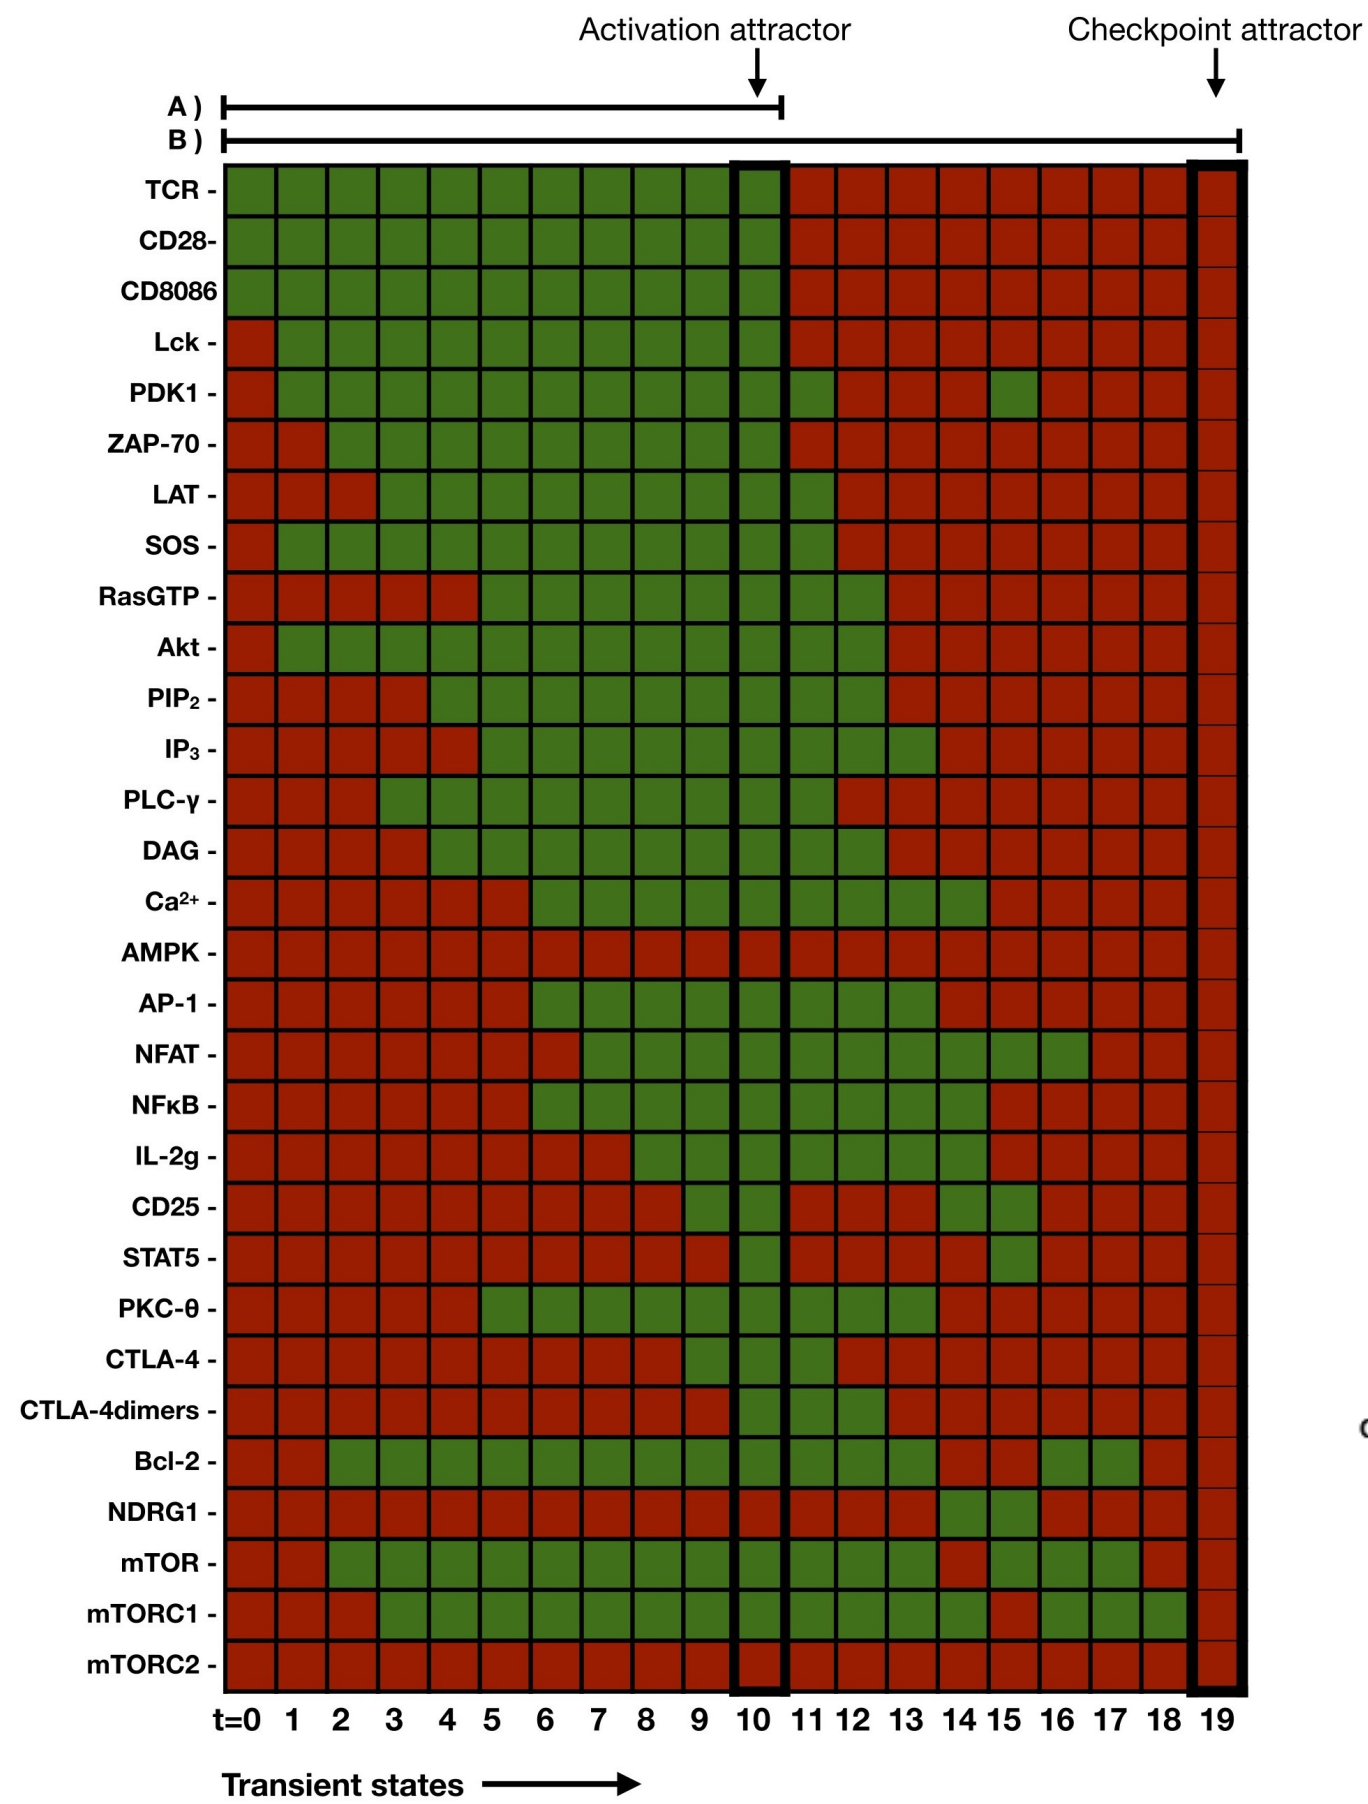

B)

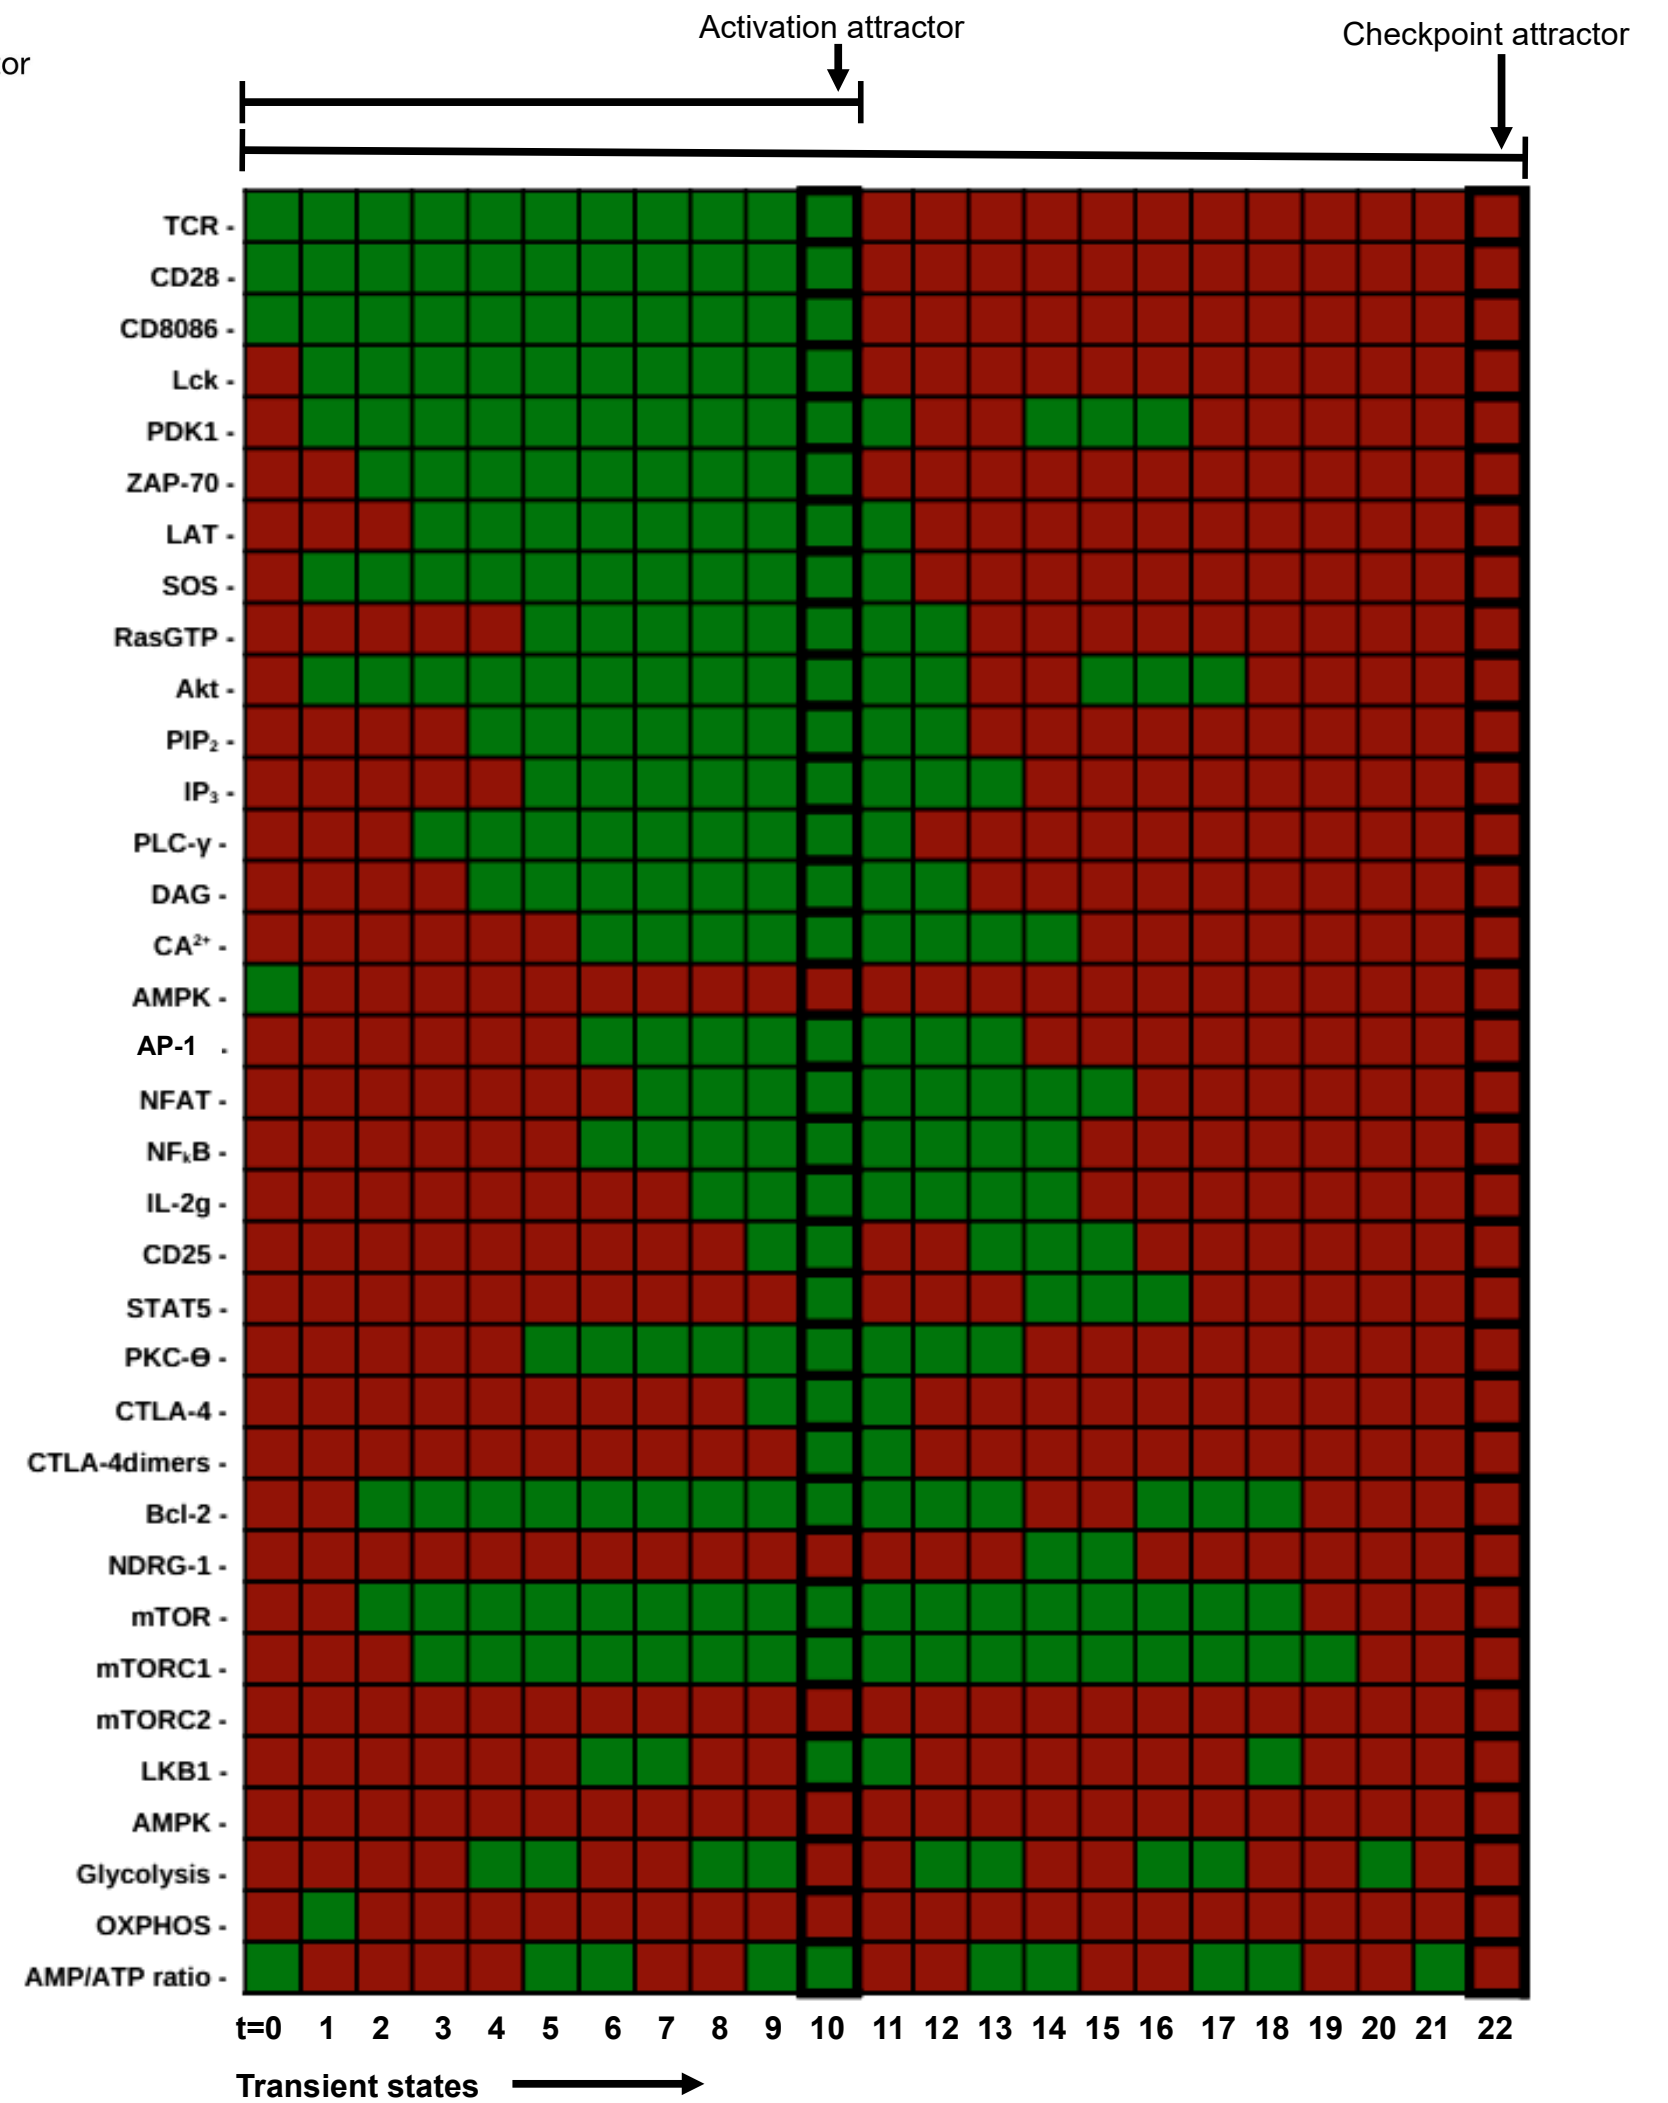

**Supplemental material 3.** Comparison of the node expression dynamics obtained using a previously published Boolean model (Martínez-Méndez et al., 2020) (A), and the version including the metabolism module, as shown in figures 2 and 3 (B). Both simulations were performed using the same initial conditions. The metabolic module does not change the general behavior of the system; both models produce the same transitory states of activation and final checkpoint attractors.
